# Supplementary material for: Models of cardiovascular surgery biobanking to facilitate translational research and precision medicine
Source: PubMed Central journal article supplement — ESC Heart Fail. 2021 Dec 21;9(1):21–30. doi: 10.1002/ehf2.13768 (PMC8787984; doi:10.1002/ehf2.13768), 2021-12-21
Supplement: EHF2-9-21-s002.pdf [file EHF2-9-21-s002.pdf]

## Human Heart Specimen Collection Flowchart

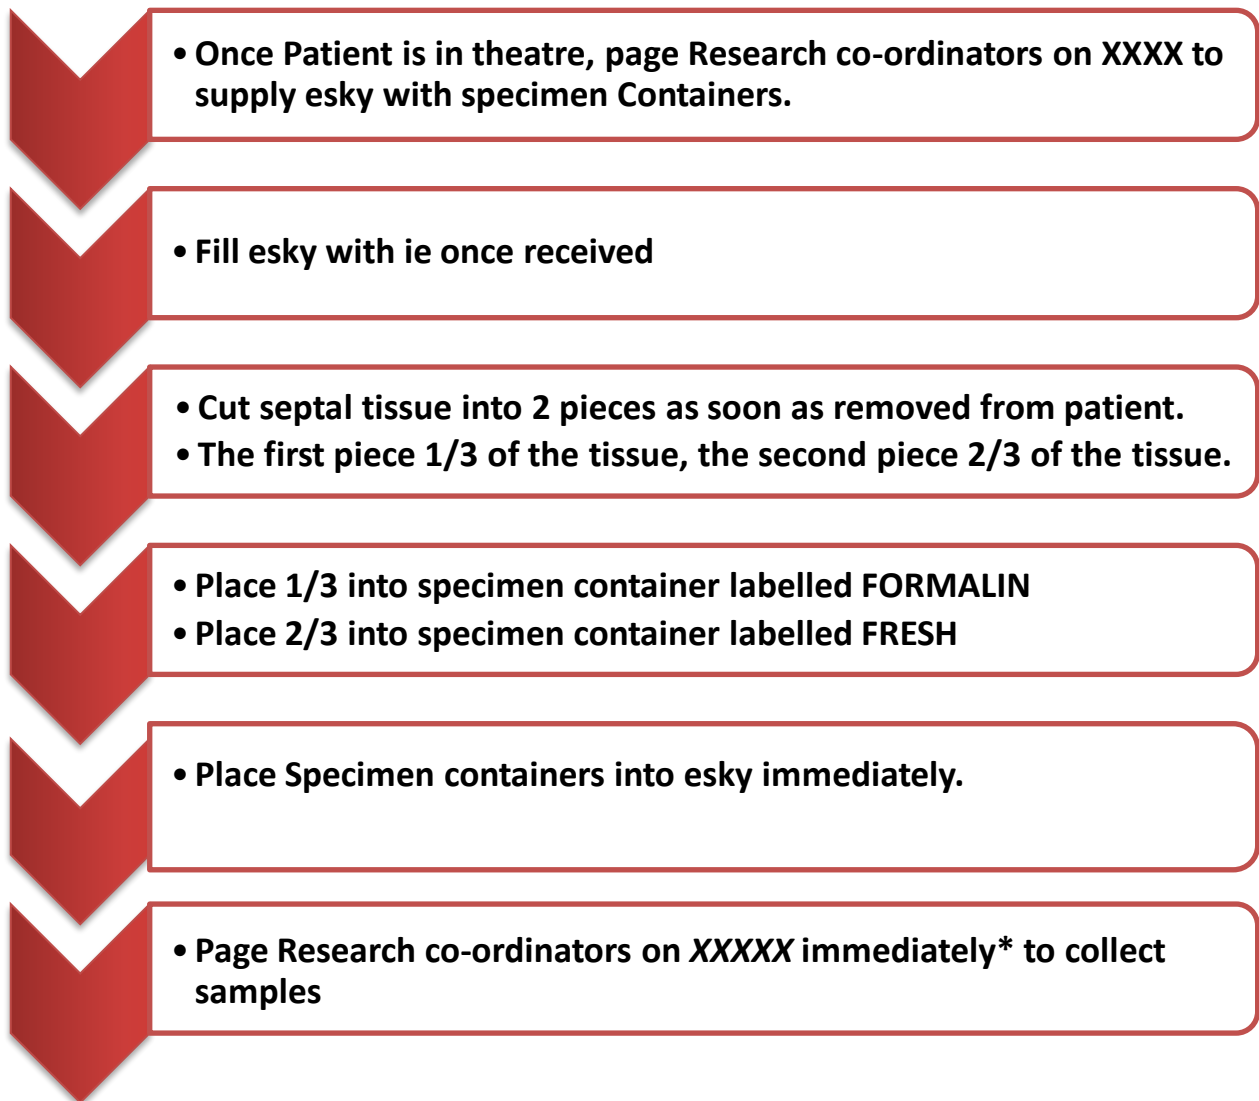

\*Tissue collected for the tissue bank needs to be processed as quickly as possible to ensure it is viable.

**Cardiovascular Research Coordinator Page number - XXXXX**
